# Supplementary material
Source: PubMed Central journal article supplement (PMC6073216)
Supplement: EMBR-19-e45964-s005.pdf [file EMBR-19-e45964-s005.pdf]

**Figure 1C**

| spreading index | ctrl siRNA | siRNA FN1 A | siRNA FN1 B | siRNA FN1 C |
|-----------------|------------|-------------|-------------|-------------|
|                 | 0.66       | 0.522       | 0.447       | 0.544       |
|                 | 0.653      | 0.478       | 0.482       | 0.564       |
|                 | 0.678      | 0.434       | 0.406       | 0.596       |
|                 | 0.722      | 0.496       | 0.55        | 0.515       |
|                 | 0.718      | 0.499       | 0.515       | 0.537       |
|                 | 0.71       | 0.481       | 0.472       | 0.587       |
|                 | 0.626      | 0.471       | 0.457       | 0.543       |
|                 | 0.605      | 0.515       | 0.478       | 0.547       |
|                 | 0.676      | 0.484       | 0.494       | 0.594       |
