# Supplementary material
Source: PubMed Central journal article supplement (PMC6073216)
Supplement: EMBR-19-e45964-s006.pdf [file EMBR-19-e45964-s006.pdf]

### Figure 2B

#### FGF-2 concentration (capillary length mm/mm<sup>2</sup>)

| 0 ng/ml    | 1 ng/ml   | 5 ng/ml    | 10 ng/ml | 20 ng/ml | 50 ng/ml |
|------------|-----------|------------|----------|----------|----------|
| 0.07314876 | 0.2144342 | 1.222786   | 5.363077 | 8.042185 | 8.84302  |
| 0.3360374  | 0.2950695 | 0.08429656 | 6.326572 | 7.158743 | 13.11156 |
| 0.1388488  | 1.411541  | 5.654384   | 5.218421 | 11.07197 | 12.07952 |
| 0.3038691  | 0         | 4.568376   | 4.914286 | 10.96196 | 9.519893 |
| 0.481893   | 3.150295  | 4.252438   | 3.959603 | 10.75873 | 11.01222 |
| 0.2244079  | 0.4904148 | 2.356908   | 8.074454 | 9.410877 | 11.10443 |

### Figure 2C

#### PEG concentration (Pa)

| 1%    | 1.30% | 1.70% | 2%    | 3%   |
|-------|-------|-------|-------|------|
| 75.79 | 282.9 | 458.4 | 784.6 | 2304 |
| 73.94 | 278.7 | 447.9 | 730.5 | 2151 |
| 73.57 | 265.8 | 363.3 | 704.3 | 2016 |

### Figure 2D

#### PEG concentration (capillary length mm/mm<sup>2</sup>)

| 1%       | 1.30%    | 1.70%    | 2%       | 3%        |
|----------|----------|----------|----------|-----------|
| 8.928062 | 11.01433 | 11.16346 | 7.666189 | 4.005267  |
| 10.50451 | 11.11248 | 5.395182 | 8.673279 | 5.219897  |
| 12.34872 | 13.32396 | 12.83613 | 11.096   | 5.087247  |
| 12.93505 | 12.46267 | 11.62887 | 8.030077 | 2.235696  |
| 16.38689 | 14.6775  | 11.17931 | 6.184277 | 1.996214  |
| 14.75149 | 14.63745 | 11.30057 | 7.169929 | 1.992098  |
| 11.55377 | 11.3261  | 10.50024 | 4.708828 | 0.8842238 |
| 15.27597 | 14.20457 | 8.505671 | 7.539334 | 0.6007313 |

**100 ng/ml**

7.583951

11.17371

8.456042

7.075167

12.22169

10.51571
