# Supplementary material
Source: PubMed Central journal article supplement (PMC6073216)
Supplement: EMBR-19-e45964-s007.pdf [file EMBR-19-e45964-s007.pdf]

### Figure 3D

#### FN1 KD MSCs (capillary length mm/mm<sup>2</sup>)

| ctrl siRNA  | siRNA FN1 B | siRNA FN1 C |
|-------------|-------------|-------------|
| 5.247306098 | 0           | 0           |
| 5.867050556 | 0.13241011  | 0           |
| 6.447607278 | 0.173340085 | 0.073704254 |
| 6.072180177 | 0.195749309 | 0           |
| 5.31833387  | 0.127183395 | 0.290688671 |
| 6.183708678 | 0           | 0.32420782  |
| 11.02686599 | 0.099875704 | 0.10559479  |
| 8.875378457 | 0.092616377 | 0.438412803 |
| 8.98632621  | 0.42375528  | 0.08863953  |
| 6.61525353  | 0.15827856  | 0.185662    |
| 10.0805402  | 0.49737116  | 0.44838649  |
| 3.34705437  | 0.28697695  | 0.42660851  |
