# Supplementary material
Source: PubMed Central journal article supplement (PMC6073216)
Supplement: EMBR-19-e45964-s008.pdf [file EMBR-19-e45964-s008.pdf]

### Figure 5A

Fold-changes (compared to mono-cultures normalized to 1)

| <b>COL1A2</b> | <b>COL3A1</b> | <b>COL4A1</b> | <b>COL4A2</b> | <b>COL5A1</b> | <b>COL5A3</b> | <b>COL18A1</b> |
|---------------|---------------|---------------|---------------|---------------|---------------|----------------|
| 4.691881      | 7.106634      | 41.40312      | 13.11519      | 3.667172      | 20.81665      | 21.46134       |
| 2.453202      | 3.169307      | 24.65544      | 12.39627      | 2.13934       | 7.190876      | 6.481531       |
| 2.209418      | 5.728532      | 24.9996       | 6.35254       | 3.223586      | 14.44668      | 18.861         |
| 1.506639      | 4.738182      | 88.12624      | 24.98516      | 2.710075      | 35.36705      | 16.34185       |
| 2.664445      | 5.543638      | 58.72216      | 16.30037      | 2.500701      | 39.50144      | 19.27731       |
| <b>SDC2</b>   | <b>NID1</b>   | <b>NID2</b>   | <b>LAMA4</b>  | <b>LAMB3</b>  | <b>LAMC1</b>  | <b>SPARC</b>   |
| 8.926951      | 3.568129      | 1.930089      | 1.7215        | 3.74942       | 1.822814      | 6.895558       |
| 10.1284       | 2.238193      | 1.903736      | 1.084352      | 2.172467      | 1.233993      | 4.259446       |
| 6.815565      | 2.144785      | 2.07964       | 2.268649      | 4.070859      | 1.816717      | 4.043672       |
| 3.826437      | 3.229926      | 2.133173      | 2.920066      | 2.772139      | 1.621693      | 2.922764       |
| 4.589486      | 2.992464      | 2.03261       | 2.020668      | 5.170606      | 1.419451      | 3.958169       |
| <b>JAG1</b>   | <b>NOTCH3</b> | <b>PDGFRB</b> |               |               |               |                |
| 14.93544      | 9.850294      | 4.595326      |               |               |               |                |
| 8.927978      | 5.097656      | 1.789844      |               |               |               |                |
| 10.87417      | 8.23252       | 2.497237      |               |               |               |                |
| 6.11139       | 15.32697      | 4.113882      |               |               |               |                |
| 11.30064      | 12.12432      | 4.005087      |               |               |               |                |

### Figure 5B

Fold-changes (compared to mono-cultures normalized to 1)

| <b>COL1A2</b> | <b>COL3A1</b> | <b>COL4A1</b> | <b>COL4A2</b> | <b>COL5A1</b> | <b>COL5A3</b> | <b>COL18A1</b> |
|---------------|---------------|---------------|---------------|---------------|---------------|----------------|
| 1.763163      | 2.33216       | 133.7906      | 34.34035      | 3.402671      | 9.701226      | 7.254283       |
| 0.7138371     | 0.8770109     | 37.47874      | 9.003592      | 1.390078      | 4.506994      | 1.626195       |
| 4.09302       | 5.234916      | 111.9594      | 40.9796       | 7.52226       | 16.82653      | 12.44361       |
| 1.537053      | 1.834855      | 156.4256      | 24.5106       | 2.993154      | 10.69354      | 3.686708       |
| 1.604918      | 1.62338       | 79.13079      | 22.44258      | 2.422508      | 9.050519      | 3.501971       |
| 1.503682      | 1.845486      | 141.4355      | 36.80934      | 2.480273      | 9.304963      | 2.564184       |
| <b>SDC2</b>   | <b>NID1</b>   | <b>NID2</b>   | <b>LAMA4</b>  | <b>LAMB3</b>  | <b>LAMC1</b>  | <b>SPARC</b>   |
| 2.746005      | 1.623191      | 3.286001      | 1.765202      | 2.235865      | 1.191957      | 3.423962       |
| 1.081099      | 0.9090933     | 0.9243431     | 1.02954       | 1.648324      | 1.027758      | 1.440596       |
| 5.898438      | 2.015773      | 3.609587      | 1.481269      | 3.346917      | 1.506638      | 7.126359       |
| 1.945759      | 1.17963       | 1.315246      | 1.137868      | 2.571007      | 1.398939      | 3.188034       |
| 2.333775      | 1.230007      | 1.360056      | 1.129485      | 2.497814      | 1.237703      | 2.867911       |
| 2.596376      | 1.78943       | 2.021604      | 1.489678      | 2.854029      | 0.985549      | 2.652771       |
| <b>JAG1</b>   | <b>NOTCH3</b> | <b>PDGFRB</b> |               |               |               |                |
| 14.36846      | 20.5111       | 1.996998      |               |               |               |                |
| 2.884859      | 7.017708      | 1.165137      |               |               |               |                |
| 22.05959      | 21.66559      | 2.7403        |               |               |               |                |
| 7.880749      | 16.55085      | 1.688607      |               |               |               |                |
| 7.653748      | 15.56966      | 2.421947      |               |               |               |                |
| 7.237545      | 14.15265      | 1.597704      |               |               |               |                |

## Figure 5C

Fold-changes (compared to mono-cultures normalized to 1)

| <b>COL1A2</b> | <b>COL3A1</b> | <b>COL4A1</b> | <b>COL4A2</b> | <b>COL5A1</b> | <b>COL5A3</b> | <b>COL18A1</b> |
|---------------|---------------|---------------|---------------|---------------|---------------|----------------|
| 1.482638      | 1.96655       | 52.53354      | 16.52601      | 2.128248      | 5.51426       | 3.457348       |
| 0.7046605     | 0.9195501     | 32.84269      | 8.331061      | 1.168372      | 3.608749      | 2.037782       |
| 2.769259      | 4.261907      | 44.51848      | 15.4961       | 5.890949      | 9.983175      | 7.774945       |
| 1.196373      | 1.388154      | 65.93625      | 12.82601      | 2.055753      | 6.42042       | 2.168204       |
| 1.154819      | 1.587951      | 58.57991      | 19.03171      | 1.924078      | 6.847926      | 3.136887       |
| 1.335149      | 2.59458       | 113.7325      | 28.29551      | 2.745368      | 7.003127      | 2.506196       |
| <b>SDC2</b>   | <b>NID1</b>   | <b>NID2</b>   | <b>LAMA4</b>  | <b>LAMB3</b>  | <b>LAMC1</b>  | <b>SPARC</b>   |
| 1.59955       | 1.395388      | 2.012051      | 1.859824      | 1.532264      | 1.184408      | 2.045093       |
| 1.084477      | 0.9993075     | 0.8145078     | 1.112264      | 1.320423      | 1.136423      | 1.131706       |
| 3.063826      | 2.219653      | 2.835953      | 1.517644      | 2.675547      | 1.265171      | 4.025027       |
| 1.119224      | 0.748721      | 0.7735144     | 0.9961948     | 1.648897      | 1.065847      | 1.819658       |
| 1.939699      | 1.394583      | 1.169858      | 1.166618      | 2.456038      | 1.063141      | 2.423626       |
| 1.988251      | 1.697605      | 1.596044      | 1.640915      | 2.18026       | 0.7711054     | 2.363621       |
| <b>JAG1</b>   | <b>NOTCH3</b> | <b>PDGFRB</b> |               |               |               |                |
| 5.387691      | 9.222555      | 1.630898      |               |               |               |                |
| 1.595491      | 5.169411      | 1.125058      |               |               |               |                |
| 8.774597      | 12.25955      | 2.297927      |               |               |               |                |
| 3.172234      | 8.15113       | 1.285653      |               |               |               |                |
| 7.419558      | 12.46087      | 2.286805      |               |               |               |                |
| 5.176585      | 13.59025      | 1.848687      |               |               |               |                |

## Figure 5E

Fold-changes (compared to IgG controls normalized to 1)

| <b>COL1A2</b> | <b>COL3A1</b> | <b>COL4A1</b> | <b>COL4A2</b> | <b>COL5A1</b> | <b>COL5A3</b> | <b>COL18A1</b> |
|---------------|---------------|---------------|---------------|---------------|---------------|----------------|
| 2.189599      | 6.765364      | 6.793557      | 4.053497      | 3.755923      | 25.90218      | 6.111395       |
| 2.1622        | 7.026631      | 7.17427       | 4.868013      | 3.014322      | 20.10525      | 4.853415       |
| 1.920968      | 3.590457      | 4.825467      | 3.653216      | 1.85532       | 9.269546      | 3.127477       |
| 1.968368      | 4.123874      | 5.230688      | 3.300081      | 3.101575      | 13.22322      | 4.697852       |
| <b>SDC2</b>   | <b>NID1</b>   | <b>NID2</b>   | <b>LAMA4</b>  | <b>LAMB3</b>  | <b>LAMC1</b>  | <b>SPARC</b>   |
| 3.385026      | 2.40022       | 3.758526      | 2.423625      | 2.325703      | 1.570438      | 2.872224       |
| 4.353974      | 1.900439      | 3.283725      | 3.358539      | 2.036134      | 2.313912      | 2.996614       |
| 3.174804      | 1.372844      | 2.202537      | 1.420272      | 1.757673      | 1.421256      | 2.940716       |
| 2.752991      | 1.507857      | 2.104533      | 1.867361      | 1.656916      | 1.493296      | 2.424185       |
| <b>JAG1</b>   | <b>NOTCH3</b> | <b>PDGFRB</b> |               |               |               |                |
| 5.47617       | 8.132324      | 3.277659      |               |               |               |                |
| 7.239211      | 13.1167       | 3.281449      |               |               |               |                |
| 3.392074      | 3.728685      | 1.605105      |               |               |               |                |
| 3.785543      | 5.333193      | 1.622818      |               |               |               |                |

### Figure 5F

#### COL4A1 Fold changes (compared to 10 nM IgG controls normalized to 1)

| nM  | Jagged1  |          |          |          |
|-----|----------|----------|----------|----------|
| 10  | 2.345128 | 1.984121 | 3.281071 | 2.492339 |
| 70  | 5.523185 | 9.652037 | 10.45412 | 8.45712  |
| 140 | 8.389975 | 8.619873 | 12.29216 | 10.42999 |
| 500 | 14.25602 | 14.30552 | 22.69548 | 21.23198 |
| nM  | IgG      |          |          |          |
| 10  | 1        | 1        | 1        | 1        |
| 70  | 1.053726 | 1.072145 | 1.564643 | 1.340093 |
| 140 | 1.009285 | 1.007654 | 1.556709 | 1.31115  |
| 500 | 1.038619 | 1.057874 | 1.244586 | 1.161106 |

#### COL18A1 Fold changes (compared to 10 nM IgG controls normalized to 1)

| nM  | Jagged1  |          |          |          |
|-----|----------|----------|----------|----------|
| 10  | 2.673383 | 2.516642 | 3.133264 | 3.261419 |
| 70  | 6.868525 | 10.19177 | 9.097687 | 9.361016 |
| 140 | 10.85033 | 8.059361 | 10.27927 | 13.22931 |
| 500 | 17.01222 | 22.00103 | 24.29914 | 27.89946 |
| nM  | IgG      |          |          |          |
| 10  | 1        | 1        | 1        | 1        |
| 70  | 1.126619 | 1.011853 | 1.323935 | 1.216581 |
| 140 | 1.260358 | 1.08335  | 1.445932 | 1.269123 |
| 500 | 1.060075 | 1.156822 | 1.400232 | 1.098091 |

#### NOTCH3 Fold changes (compared to 10 nM IgG controls normalized to 1)

| nM  | Jagged1  |           |          |           |
|-----|----------|-----------|----------|-----------|
| 10  | 2.065752 | 1.704088  | 3.211321 | 2.556199  |
| 70  | 6.36871  | 8.060298  | 10.6258  | 6.779441  |
| 140 | 6.890779 | 5.464787  | 9.551101 | 7.801041  |
| 500 | 10.16825 | 9.569867  | 13.75929 | 12.1819   |
| nM  | IgG      |           |          |           |
| 10  | 1        | 1         | 1        | 1         |
| 70  | 1.21841  | 0.8922377 | 1.620943 | 0.9974613 |
| 140 | 1.199418 | 1.048262  | 1.488645 | 1.254257  |
| 500 | 1.039339 | 0.8140368 | 1.326079 | 0.9716435 |
