# Supplementary material
Source: PubMed Central journal article supplement (PMC6073216)
Supplement: EMBR-19-e45964-s009.pdf [file EMBR-19-e45964-s009.pdf]

**Figure 6**

Fold-changes (compared to IgG/IgG controls normalized to 1)

**COL4A1**

| <b>IgG/Jagged1</b> | <b>IgG/IgG</b> | <b>Jagged1/IgG</b> | <b>Jagged1/Jagged1</b> |
|--------------------|----------------|--------------------|------------------------|
| 4.194502           | 1              | 0.473357           | 4.218315               |
| 2.067183           | 1              | 0.907309           | 4.447002               |
| 4.963989           | 1              | 1.226885           | 8.116363               |
| 5.217404           | 1              | 1.11458            | 9.941745               |
| 6.180971           | 1              | 0.963151           | 9.585365               |

**COL4A2**

| <b>IgG/Jagged1</b> | <b>IgG/IgG</b> | <b>Jagged1/IgG</b> | <b>Jagged1/Jagged1</b> |
|--------------------|----------------|--------------------|------------------------|
| 2.238449           | 1              | 1.847403           | 9.894765               |
| 1.701924           | 1              | 1.196788           | 3.722657               |
| 3.338039           | 1              | 1.270151           | 5.032703               |
| 4.292542           | 1              | 1.801876           | 10.83404               |
| 3.659973           | 1              | 1.060197           | 6.291188               |

**COL18A1**

| <b>IgG/Jagged1</b> | <b>IgG/IgG</b> | <b>Jagged1/IgG</b> | <b>Jagged1/Jagged1</b> |
|--------------------|----------------|--------------------|------------------------|
| 6.362084           | 1              | 1.3449             | 7.959431               |
| 4.449568           | 1              | 3.543478           | 13.57455               |
| 3.593778           | 1              | 2.514899           | 9.895918               |
| 5.964218           | 1              | 3.395209           | 15.01154               |
| 6.127645           | 1              | 3.134714           | 13.99494               |

**COL3A1**

| <b>IgG/Jagged1</b> | <b>IgG/IgG</b> | <b>Jagged1/IgG</b> | <b>Jagged1/Jagged1</b> |
|--------------------|----------------|--------------------|------------------------|
| 5.068291           | 1              | 0.649094           | 4.492958               |
| 2.251936           | 1              | 0.978855           | 6.053769               |
| 2.217602           | 1              | 0.855892           | 3.949948               |
| 3.574725           | 1              | 0.923702           | 4.768382               |
| 4.523166           | 1              | 0.860551           | 4.972023               |

**SDC2**

| <b>IgG/Jagged1</b> | <b>IgG/IgG</b> | <b>Jagged1/IgG</b> | <b>Jagged1/Jagged1</b> |
|--------------------|----------------|--------------------|------------------------|
| 1.967685           | 1              | 1.090508           | 4.783831               |
| 4.134367           | 1              | 1.565004           | 5.190353               |
| 3.497926           | 1              | 1.755034           | 5.282911               |
| 5.410763           | 1              | 1.689386           | 8.386097               |
| 5.576396           | 1              | 1.397001           | 6.280301               |

**NOTCH3**

| <b>IgG/Jagged1</b> | <b>IgG/IgG</b> | <b>Jagged1/IgG</b> | <b>Jagged1/Jagged1</b> |
|--------------------|----------------|--------------------|------------------------|
| 6.636857           | 1              | 0.661585           | 7.809153               |
| 4.928557           | 1              | 1.61851            | 11.06425               |
| 3.521039           | 1              | 1.419124           | 7.726603               |
| 9.70907            | 1              | 1.925855           | 18.7979                |
| 6.858214           | 1              | 1.495194           | 13.44813               |

**NID2**

| <b>IgG/Jagged1</b> | <b>IgG/IgG</b> | <b>Jagged1/IgG</b> | <b>Jagged1/Jagged1</b> |
|--------------------|----------------|--------------------|------------------------|
| 2.718858           | 1              | 0.959597           | 2.874212               |
| 3.167107           | 1              | 1.031088           | 4.476383               |
| 2.15472            | 1              | 0.842647           | 2.712896               |
| 2.203556           | 1              | 0.82932            | 2.710389               |
| 2.430636           | 1              | 0.715902           | 2.768939               |

**JAG1**

| <b>IgG/Jagged1</b> | <b>IgG/IgG</b> | <b>Jagged1/IgG</b> | <b>Jagged1/Jagged1</b> |
|--------------------|----------------|--------------------|------------------------|
| 3.980639           | 1              | 1.397647           | 6.86456                |
| 5.577685           | 1              | 1.350663           | 7.536181               |
| 2.785623           | 1              | 1.326385           | 3.552498               |
| 5.423905           | 1              | 1.485039           | 7.999993               |
| 4.805986           | 1              | 1.365409           | 5.90867                |
